# Supplementary material
Source: MDPI journal article supplement (https://www.mdpi.com/1424-2818/13/9/416)
Supplement: s1 [file s1]

## Supporting Information: Code

**Supplementary S1:** Example of R and BUGS code for the models used in estimating the parrot's geographic range. The code includes the CAR component of the model, accounting for effort and site covariates.

```
## Extract the spatial adjacencies:

muni = readOGR("DISTRIBUTION.shp") #read the municipality shapefile

muni.centroids <- getSpPPolygonsLabptSlots(muni) #extract the centroids

make_grid <- function(x, cell_diameter, cell_area, clip = FALSE) {
  if (missing(cell_diameter)) {
    if (missing(cell_area)) {
      stop("Must provide cell_diameter or cell_area")
    } else {
      cell_diameter <- sqrt(2 * cell_area / sqrt(3))
    }
  }
  ext <- as(extent(x) + cell_diameter, "SpatialPolygons")
  projection(ext) <- projection(x)
  # generate array of hexagon centers
  g <- spsample(ext, type = "hexagonal", cellsize = cell_diameter,
    offset = c(0.5, 0.5))
  # convert center points to hexagons
  g <- HexPoints2SpatialPolygons(g, dx = cell_diameter)
  # clip to boundary of study area
  if (clip) {
    g <- gIntersection(g, x, byid = TRUE)
  } else {
    g <- g[x, ]
  }
  # clean up feature IDs
  row.names(g) <- as.character(1:length(g))
  return(g)
}

hex <- make_grid(muni, cell_diameter = .5)
hex.centroids <- getSpPPolygonsLabptSlots(hex)

cell.id <- c()
for (a in 1:nrow(muni.centroids)){
  cell.id[a] <- which.min(sqrt((hex.centroids[,1]-
muni.centroids[a,1])^2+(hex.centroids[,2]-muni.centroids[a,2])^2))
}

## Convert the polygonal representation into a neighborhood list
hex.nb = poly2nb(hex)
num <- sapply(hex.nb,length)
sumNeigh <- sum(num)
adj = unlist(hex.nb)
```

```

#Data object specification in R
data <- list(muni1 = dat$IDENT, muni2 = dat2$IDENT, muni3 = dat3$IDENT,
            muni4 = dat4$IDENT, Y1 = dat$A_VINACEA, Y2 = dat2$A_VINACEA, Y3 =
            dat3$AVINACEA, Y4 = dat4$A_VINACEA, nMuni = length(muni), nObs1 =
            nrow(dat), nObs2 = nrow(dat2), nObs3 = nrow(dat3), nObs4 =
            nrow(dat4), Tobs = dat$EFFORT_MIN/60, SSee = dat2$NSPECIES, Tobs2 =
            dat2$DURATION.M/60, RLen = dat2$EFFORT.DIS, NPho = dat3$NPIC,
            NAud = dat3$NSONG, NAud2 = dat4$NSONGS, VegCover = VegCover,
            ArauCover = ArauCover, Alt = Altitude, nCell =
            nrow(hex.centroids), cell.id = cell.id, nMuni = length(muni), adj
            = adj, num = num, sumNeigh = sumNeigh)

# Model specification in BUGS language
cat(file = "model.txt", "
model {
  #CAR prior - spatial random effect
  for(j in 1:sumNeigh){weights[j] <- 1}
  spacesigma ~ dunif(0,5)
  spacetau <- 1/(spacesigma*spacesigma)
  delta[1:nCell] ~ car.normal(adj[],weights[],num[],spacetau)

### data model

  for (i in 1:nMuni){    #loop over sites
    mu[i] <- alpha[cell.id[i]] + beta[1] + beta[2]*VegCover[i] +
    beta[3]*ArauCover[i] + beta[4]*Alt[i]
    mu.lim[i] <- min(10, max(-10, mu[i]))
    logit(psi[i]) <- mu.lim[i]
    z[i] ~ dbern(psi[i])
  }

  for (n in 1:nObs1){      #loop over observations - Count Data
    e1[n] <- BETA[1]*Tobs[n]
    P1[n] <- 1-pow((1-0.5), e1[n])
    zP1[n] <- P1[n]*z[muni1[n]]
    Y1[n] ~ dbern(zP1[n])
  }

  for (j in 1:nObs2){      #loop over observations - eBird Data
    e2[j] <- BETA[2]*SSee[j] + BETA[3]*Tobs2[j] + BETA[4]*RLen[j]
    P2[j] <- 1-pow((1-0.5), e2[j])
    zP2[j] <- P2[j]*z[muni2[j]]
    Y2[j] ~ dbern(zP2[j])
  }

  for (k in 1:nObs3){      #loop over observations - Wikiaves data
    e3[k] <- BETA[5]*NPho[k] + BETA[6]*NAud[k]
    P3[k] <- 1-pow((1-0.5), e3[k])
    zP3[k] <- P3[k]*z[muni3[k]]
    Y3[k] ~ dbern(zP3[k])
  }

  for (h in 1:nObs4){      #loop over observations - Xeno-Canto data

```

```

        e4[h] <- BETA[7]*NAud2[h]
        P4[h] <- 1-pow((1-0.5), e4[h])
        zP4[h] <- P4[h]*z[muni4[h]]
        Y4[h] ~ dbern(zP4[h])
    }

beta[1] ~ dunif(-10,10)
beta[2] ~ dunif(-10,10)
beta[3] ~ dunif(-10,10)
beta[4] ~ dunif(-10,10)

for (b in 1:7){
    BETA[b] ~ dnorm(0,0.0001) I(0,10000)
}

#compute the mean detection probability of each dataset:
muP1 <- mean(P1[])
muP2 <- mean(P2[])
muP3 <- mean(P3[])
muP4 <- mean(P4[])

}

#Back to R language:

#Specification of Initial Values
inits = function() {list(z = rep(1, data$nMuni))}
params <- c("beta", "psi", "z", "alpha", "muP1", "muP2", "muP3", "muP4",
            "muP5", "muP6", "muP7", "muP8", "Y2", "Y4", "Y6", "Y8",
            "spacesigma", "delta")

#MCMC settings
nc <- 3;    nb <- 150000;    ni <- 200000;    nt <- 100

out <- bugs(data = data, inits = inits, parameters.to.save = params,
            model.file = "model.txt", n.chains = nc, n.iter = ni,
            n.burnin = nb, n.thin = nthin, debug = TRUE)

```

**Table S1:** Compilation of the available counts for *Amazona brasiliensis* with the respective reference.

| Year | Counted number of individuals | Source of information            |
|------|-------------------------------|----------------------------------|
| 1989 | 1,581                         | Scherer-Neto, 1989               |
| 1993 | 1,550                         | Martuscelli, 1995                |
| 1994 | 1,988                         | Scherer-Neto and Toledo, 2007    |
| 1995 | 3,672                         | Scherer-Neto and Toledo, 2007    |
| 1996 | 2,294                         | Scherer-Neto and Toledo, 2007    |
| 1997 | 1,548                         | Scherer-Neto and Toledo, 2007    |
| 1998 | 1,965                         | Scherer-Neto and Toledo, 2007    |
| 1999 | 2,512                         | Scherer-Neto and Toledo, 2007    |
| 2000 | 3,452                         | Scherer-Neto and Toledo, 2007    |
| 2003 | 3,657                         | Galetti et al., 2006; SPVS, 2003 |
| 2004 | 6,589                         | Galetti et al., 2006; SPVS, 2004 |
| 2005 | 4,870                         | SPVS, 2005                       |
| 2006 | 3,000                         | SPVS, 2006                       |
| 2007 | 4,821                         | SPVS, 2007                       |
| 2008 | 4,100                         | SPVS, 2008                       |
| 2009 | 5,099                         | SPVS, 2009                       |
| 2010 | 5,000                         | SPVS, 2010                       |
| 2011 | 6,412                         | SPVS, 2011                       |
| 2012 | 4,141                         | SPVS, 2012                       |
| 2013 | 6,086                         | SPVS, 2013                       |
| 2014 | 7,451                         | SPVS, 2014                       |
| 2015 | 9,176                         | SPVS, 2015                       |
| 2016 | 8,380                         | SPVS, 2016                       |
| 2017 | 7,339                         | SPVS, 2017                       |
| 2018 | 9,112                         | SPVS, 2018                       |
| 2019 | 7,493                         | SPVS, 2019                       |

**Table S2:** Compilation of the available counts for *Amazona pretrei* with the respective reference.

| Year | Counted number of individuals | Source of information                                                              |
|------|-------------------------------|------------------------------------------------------------------------------------|
| 1971 | 10,000-30,000                 | Forshaw and Cooper, 1978; cited by Varty et al., 1994                              |
| 1972 | 10,000                        | W. Belton in Silva 1989; cited by Varty et al., 1994                               |
| 1975 | 5,000                         | Silva, 1981                                                                        |
| 1980 | 1,000                         | Silva, 1981                                                                        |
| 1981 | 10,000                        | R. Reis verb to N. Varty; cited by Varty et al., 1994                              |
| 1983 | 10,000                        | Belton, 1984                                                                       |
| 1986 | 8,000                         | COA pers. commun. to N. Varty; cited by Varty et al., 1994                         |
| 1988 | 10,000                        | COA pers. commun. to N. Varty; cited by Varty et al., 1994                         |
| 1989 | 9,500-14,000                  | COA pers. commun. to N. Varty/Scherer Neto 1991; cited by Varty et al., 1994       |
| 1990 | 30-70                         | J. Mahler pers. commun. to N. Varty/Scherer Neto 1991; cited by Varty et al., 1994 |
| 1991 | 15-200                        | COA pers. commun. to N. Varty/Scherer Neto 1991; cited by Varty et al., 1994       |
| 1992 | 7,000-7,500                   | Varty et al., 1994                                                                 |
| 1993 | 7,500-8,000                   | Varty et al., 1994                                                                 |
| 1994 | 8,000-8,500                   | Varty et al., 1994                                                                 |
| 1995 | 8,593                         | Martinez and Prestes, 2008                                                         |
| 1996 | 11,590                        | Martinez and Prestes, 2008                                                         |
| 1997 | 19,141                        | Martinez and Prestes, 2008                                                         |
| 1998 | 19,913                        | Martinez and Prestes, 2008                                                         |
| 1999 | 19,517                        | Martinez and Prestes, 2008                                                         |
| 2000 | 16,232                        | Martinez and Prestes, 2008                                                         |
| 2001 | 16,897                        | Martinez and Prestes, 2008                                                         |
| 2002 | 18,418                        | Martinez and Prestes, 2008                                                         |
| 2003 | 17,162                        | Martinez and Prestes, 2008                                                         |
| 2004 | 16,772                        | Martinez and Prestes, 2008                                                         |
| 2005 | 20,437                        | Martinez and Prestes, 2008                                                         |
| 2006 | 21,598                        | Martinez and Prestes, 2008                                                         |
| 2007 | 18,800                        | Martinez and Prestes, 2008                                                         |
| 2008 | 21,311                        | Schunck et al., 2011                                                               |
| 2009 | 15,658                        | Schunck et al., 2011                                                               |
| 2010 | 16,657                        | Schunck et al., 2011                                                               |

|      |        |                                            |
|------|--------|--------------------------------------------|
| 2011 | 21,653 | Schunck et al., 2011                       |
| 2014 | 15,685 | Tella et al., 2016 citing unpublished data |
| 2017 | 20,128 | ICMBio, 2020                               |
| 2018 | 18,425 | ICMBio, 2020                               |
| 2019 | 19,872 | ICMBio, 2020                               |

**Table S3:** Compilation of the available counts and abundance estimates for *Amazona vinacea* with the respective reference.

| Year | Counted number of individuals | Estimated number of individuals | Source of information                          |
|------|-------------------------------|---------------------------------|------------------------------------------------|
| 2001 | 464                           | —                               | Abe, 2004; Cockle et al., 2007                 |
| 2002 | 899                           | —                               | Abe, 2004                                      |
| 2003 | 906                           | —                               | Abe, 2004                                      |
| 2004 | 514                           | —                               | Abe, 2004                                      |
| 2005 | 423                           | —                               | Cockle et al., 2007; Segovia and Cockle, 2012  |
| 2007 | 203                           | —                               | Segovia and Cockle, 2012                       |
| 2008 | 214                           | —                               | Segovia and Cockle, 2012                       |
| 2009 | 214                           | —                               | Segovia and Cockle, 2012                       |
| 2010 | 125                           | —                               | Segovia and Cockle, 2012                       |
| 2011 | 911                           | —                               | Prestes et al., 2014; Segovia and Cockle, 2012 |
| 2012 | 747                           | —                               | Prestes et al., 2014                           |
| 2013 | 728                           | —                               | Prestes et al., 2014                           |
| 2014 | 1,752                         | —                               | N. Prestes, pers. commun.                      |
| 2015 | 3,160                         | —                               | N. Prestes, pers. commun.                      |
| 2016 | 3,888                         | 7,789 (c.i. 6,586- 9,184)       | Zulian et al., 2020                            |
| 2017 | 4,084                         | 8,483 (c.i. 7,181- 9977)        | Zulian et al., 2020                            |
| 2018 | 4,758                         | —                               | ICMBio, 2020                                   |

## References:

- Abe, L.M., 2004. Caracterização do hábitat do papagaio-de-peito-roxo *Amazona vinacea* (Kuhl, 1820) no município de Tunas do Paraná, região metropolitana de Curitiba, Paraná (Dissertação de mestrado: Ciência do solo). Universidade Federal do Paraná, Curitiba, PR.
- Belton, W., 1984. Birds of Rio Grande do Sul, Brazil. Part 1. Rheidae through Furnariidae. Bulletin of the American Museum of Natural History, New York.
- Cockle, K., Capuzzi, G., Bodrati, A., Clay, R., del Castillo, H., Velázquez, M., Areta, J.I., Fariña, N., Fariña, R., 2007. Distribution, abundance, and conservation of Vinaceous Amazons (*Amazona vinacea*) in Argentina and Paraguay. Journal of Field Ornithology 78, 21–39. <https://doi.org/10.1111/j.1557-9263.2006.00082.x>
- Forshaw, J.M., Cooper, W.T., 1978. Parrots of the world, Second Edition. ed. Lansdowne Press, Melbourne, Australia.
- Galetti, M., Schunck, F., Ribeiro, M., Paiva, A.A., Toledo, R., Fonseca, L., 2006. Distribuição e tamanho populacional do papagaio-de-cara-roxa *Amazona brasiliensis* no estado de São Paulo. Revista Brasileira de Ornitologia 239–247.
- ICMBio, 2020. Plano de Ação Nacional para a Conservação dos Papagaios - PAN Papagaios: Matriz de Monitoria.
- Martinez, J., Prestes, N.P., 2008. Tamanho populacional, tamanho médio de bando e outros aspectos demográficos do papagaio-charão (*Amazona pretrei*), in: Martinez, J., Prestes, N.P. (Eds.), Biologia Da Conservação: Estudo de Caso Com Papagaio-Charão e Outros Papagaios Brasileiros. UPF Editora, Passo Fundo, RS.
- Martuscelli, P., 1995. Ecology and conservation of the Red-tailed Amazon *Amazona brasiliensis* in south-eastern Brazil. Bird Conservation International 5, 405–420. <https://doi.org/10.1017/S095927090000112X>
- Prestes, N.P., Martinez, J., Kilpp, J.C., Batistela, T., Turkievicz, A., Rezende, É., Gaboardi, V.T.R., 2014. Ecologia e conservação de *Amazona vinacea* em áreas simpátricas com *Amazona pretrei*. Ornithologia 6, 109–120.
- Scherer-Neto, P., 1989. Contribuição à biologia do papagaio-de-cara-roxa *Amazona brasiliensis* (Linnaeus, 1758) (Psittacidae, Aves) (Dissertação de Mestrado: Zoologia). Universidade Federal do Paraná, Curitiba, PR.
- Scherer-Neto, P., Toledo, M.C., 2007. Avaliação populacional do papagaio-de-cara-roxa (*Amazona brasiliensis*) (Psittacidae) no Estado do Paraná, Brasil. Ornithologia Neotropical 18, 379–393.
- Schunck, F., Somenzari, M., Lugarini, C., Soares, E.S., 2011. Plano de Ação Nacional para a Conservação dos Papagaios da Mata Atlântica. Instituto Chico Mendes de Conservação da Biodiversidade - ICMBio, Brasília.
- Segovia, J.M., Cockle, K.L., 2012. Conservación del Loro vinoso (*Amazona vinacea*) en Argentina. El hornero 27, 027–037.
- Silva, F., 1981. Contribuição ao conhecimento da biologia do papagaio charão, *Amazona pretrei* (TEMMINCK, 1830) (Psittacidae, Aves). Iheringia. Sér. Zool. 58, 79–85.
- SPVS, 2019. Relatório Anual 2019. Sociedade de Pesquisa em Vida Selvagem e Educação Ambiental, Curitiba, PR.

- SPVS, 2018. Relatório Anual 2018. Sociedade de Pesquisa em Vida Selvagem e Educação Ambiental, Curitiba, PR.
- SPVS, 2017. Relatório Anual 2017. Sociedade de Pesquisa em Vida Selvagem e Educação Ambiental, Curitiba, PR.
- SPVS, 2016. Relatório Anual 2016. Sociedade de Pesquisa em Vida Selvagem e Educação Ambiental, Curitiba, PR.
- SPVS, 2015. Relatório Anual 2015. Sociedade de Pesquisa em Vida Selvagem e Educação Ambiental, Curitiba, PR.
- SPVS, 2014. Relatório Anual 2014. Sociedade de Pesquisa em Vida Selvagem e Educação Ambiental, Curitiba, PR.
- SPVS, 2013. Relatório Anual 2013. Sociedade de Pesquisa em Vida Selvagem e Educação Ambiental, Curitiba, PR.
- SPVS, 2012. Relatório Anual 2012. Sociedade de Pesquisa em Vida Selvagem e Educação Ambiental, Curitiba, PR.
- SPVS, 2011. Relatório Anual 2011. Sociedade de Pesquisa em Vida Selvagem e Educação Ambiental, Curitiba, PR.
- SPVS, 2010. Relatório Anual 2010. Sociedade de Pesquisa em Vida Selvagem e Educação Ambiental, Curitiba, PR.
- SPVS, 2009. Relatório Anual 2009. Sociedade de Pesquisa em Vida Selvagem e Educação Ambiental, Curitiba, PR.
- SPVS, 2008. Relatório Anual 2008. Sociedade de Pesquisa em Vida Selvagem e Educação Ambiental, Curitiba, PR.
- SPVS, 2007. Relatório Anual 2007. Sociedade de Pesquisa em Vida Selvagem e Educação Ambiental, Curitiba, PR.
- SPVS, 2006. Relatório Anual 2006. Sociedade de Pesquisa em Vida Selvagem e Educação Ambiental, Curitiba, PR.
- SPVS, 2005. Relatório Anual 2005. Sociedade de Pesquisa em Vida Selvagem e Educação Ambiental, Curitiba, PR.
- SPVS, 2004. Relatório Anual 2004. Sociedade de Pesquisa em Vida Selvagem e Educação Ambiental, Curitiba, PR.
- SPVS, 2003. Relatório Anual 2003. Sociedade de Pesquisa em Vida Selvagem e Educação Ambiental, Curitiba, PR.
- Tella, J.L., Dénes, F.V., Zulian, V., Prestes, N.P., Martínez, J., Blanco, G., Hiraldo, F., 2016. Endangered plant-parrot mutualisms: seed tolerance to predation makes parrots pervasive dispersers of the Parana pine. *Scientific Reports* 6, 31709. <https://doi.org/10.1038/srep31709>
- Varty, N., Bencke, G.A., Bernardini, L.M., Cunha, A.S., Dias, E.V., Fontana, C.S., Guadagnin, D.L., Kindel, A., Kindel, E., Raymundo, M.M., Richter, M., Rosa, A.O., Tostes, C.A.S., 1994. Conservação do papagaio-charão *Amazona pretrei* no sul do Brasil: um plano de ação preliminar. Divulgações do Museu de Ciências e Tecnologia UBEA/PUCRS: EDIPUCRS, Porto Alegre, RS.
- Zulian, V., Müller, E.S., Cockle, K.L., Lesterhuis, A., Tomasi Júnior, R., Prestes, N.P., Martinez, J., Kéry, M., Ferraz, G., 2020. Addressing multiple sources of uncertainty in the



estimation of global parrot abundance from roost counts: A case study with the  
Vinaceous-breasted Parrot (*Amazona vinacea*). Biological Conservation 248, 108672.  
<https://doi.org/10.1016/j.biocon.2020.108672>
